# Supplementary material for: Heterometallic perovskite-type metal–organic framework with an ammonium cation: structure, phonons, and optical response of [NH4]Na0.5CrxAl0.5−x(HCOO)3 (x = 0, 0.025 and 0.5)
Source: Royal Society of Chemistry journal article supplement (doi:10.1039/c8cp03788d), 2018-01-01
Supplement: c8cp03788d1.pdf [file c8cp03788d1.pdf]

# Heterometallic perovskite-type metal-organic framework with an ammonium cation: structure, phonons, and optical response of $[\text{NH}_4]\text{Na}_{0.5}\text{Cr}_x\text{Al}_{0.5-x}(\text{HCOO})_3$ ( $x=0, 0.025$ and $1$ )

by *Maciej Ptak et al.*

Electronic Supplementary information

Fig. S1. The DSC trace for AmNaCr.

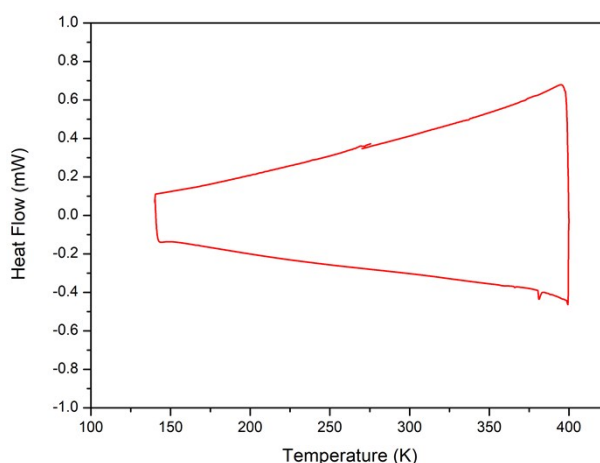

Fig. S2. The experimental XRD patterns of AmNaCr (red line) and AmNaAlCr (blue line) together with simulated one (black line) for AmNaCr basing on the crystal structure refinement.

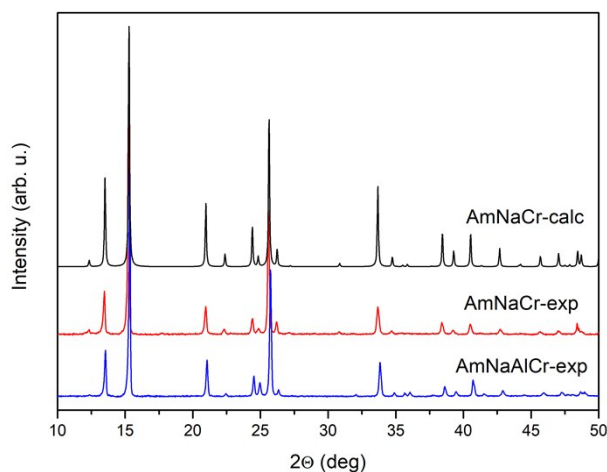

Fig. S3. X-ray diffraction experimental details for AmNaCr.

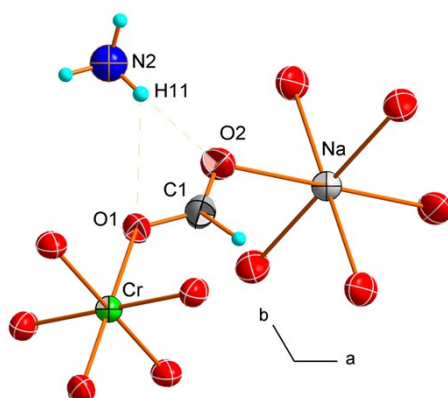

Fig. S4. The temperature evolution of wavenumber (red circles, left scales) and FWHM (blue squares, right scales) of selected Raman bands corresponding to HCOO<sup>-</sup> ions: (a)  $\nu_1$  (symmetric CH stretching), (b)  $\nu_5$  (CH in plane bending), (c, f)  $\nu_2$  (symmetric stretching CO), (d)  $\nu_6$  (CH out of plane bending), (e)  $\nu_3$  (symmetric OCO bending), (g, h) translational and (i–k) librational modes.

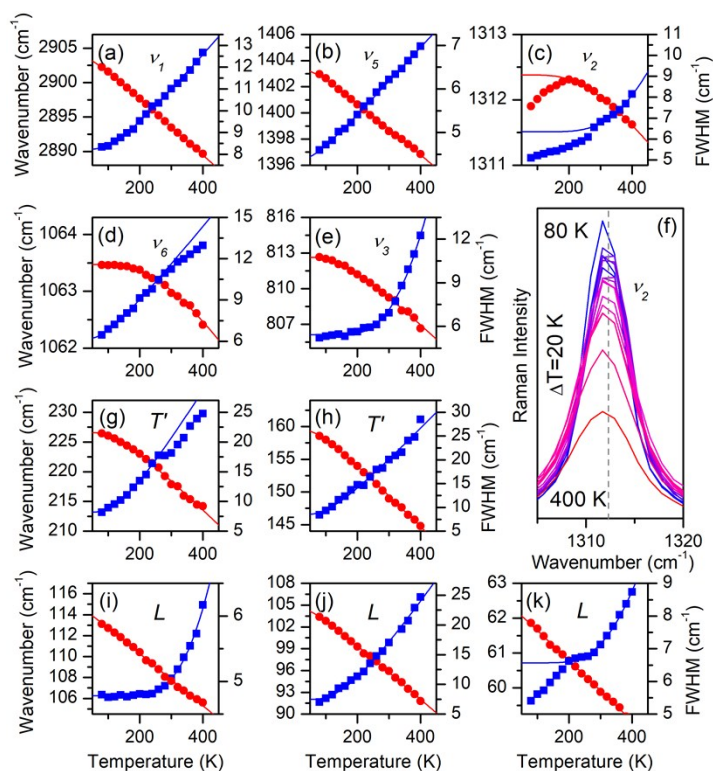

Tab. S1. X-ray diffraction experimental details for AmNaCr.

| <i>Crystal data</i>                                                        |                                                                        |
|----------------------------------------------------------------------------|------------------------------------------------------------------------|
| Chemical formula                                                           | $C_3H_7Cr_{0.50}NNa_{0.50}O_6$                                         |
| $M_r$                                                                      | 190.59                                                                 |
| Crystal system, space group                                                | Trigonal, $R\bar{3}:H$                                                 |
| Temperature (K)                                                            | 298                                                                    |
| $a, c$ (Å)                                                                 | 7.9386(5), 21.494(3)                                                   |
| $V$ (Å <sup>3</sup> )                                                      | 1173.1(2)                                                              |
| $Z$                                                                        | 6                                                                      |
| Radiation type                                                             | MoK $\alpha$                                                           |
| $\mu$ (mm <sup>-1</sup> )                                                  | 0.82                                                                   |
| Crystal size (mm)                                                          | 0.18×0.15×0.09                                                         |
| <i>Data collection</i>                                                     |                                                                        |
| Diffractometer                                                             | Xcalibur, Atlas                                                        |
| Absorption correction                                                      | Multi-scan <i>CrysAlis PRO</i>                                         |
| $T_{\min}, T_{\max}$                                                       | 0.855, 1.000                                                           |
| No. of measured, independent and observed [ $I > 2\sigma(I)$ ] reflections | 3383, 586, 444                                                         |
| $R_{\text{int}}$                                                           | 0.049                                                                  |
| $(\sin \theta/\lambda)_{\text{max}}$ (Å <sup>-1</sup> )                    | 0.655                                                                  |
| <i>Refinement</i>                                                          |                                                                        |
| $R[F^2 > 2\sigma(F^2)], wR(F^2), S$                                        | 0.040, 0.092, 1.02                                                     |
| No. of reflections                                                         | 586                                                                    |
| No. of parameters                                                          | 39                                                                     |
| No. of restraints                                                          | 3                                                                      |
| H-atom treatment                                                           | H atoms treated by a mixture of independent and constrained refinement |
| $\Delta\rho_{\text{max}}, \Delta\rho_{\text{min}}$ (e Å <sup>-3</sup> )    | 0.28, -0.30                                                            |
| Computer programs: <i>SHELXL2014/7</i> .                                   |                                                                        |

Tab. S2. Selected geometric parameters for AmNaCr (Å, °).

|           |            |
|-----------|------------|
| Cr–O1 × 6 | 1.9683(17) |
| Na–O2 × 6 | 2.4082(19) |
| O1–C1     | 1.255(3)   |
| C1–O2     | 1.216(3)   |
| C1–H1     | 0.9300     |
| N2–H11    | 0.873(5)   |
| N2–H21    | 0.871(5)   |

|                         |                    |
|-------------------------|--------------------|
| O–Cr–O <sub>cis</sub>   | 88.74(7)–91.26 (7) |
| O–Cr–O <sub>trans</sub> | 180.0              |
| O–Na–O <sub>cis</sub>   | 86.70(7)–93.30 (7) |
| O–Na–O <sub>trans</sub> | 180.00(6)          |
| O2–C1–O1                | 126.8(3)           |

Tab. S3. Selected Selected hydrogen-bond parameters for AmNaCr.

| <i>D</i> –H··· <i>A</i>    | <i>D</i> –H (Å) | H··· <i>A</i> (Å) | <i>D</i> ··· <i>A</i> (Å) | <i>D</i> –H··· <i>A</i> (°) |
|----------------------------|-----------------|-------------------|---------------------------|-----------------------------|
| N2–H11···O2                | 0.873(5)        | 1.983(6)          | 2.852(2)                  | 173.3(17)                   |
| N2–H21···O1 <sup>i</sup>   | 0.871(5)        | 2.592(5)          | 3.324(4)                  | 142.19(9)                   |
| N2–H21···O1 <sup>ii</sup>  | 0.871(5)        | 2.592(5)          | 3.324(4)                  | 142.19(9)                   |
| N2–H21···O1 <sup>iii</sup> | 0.871(5)        | 2.592(5)          | 3.324(4)                  | 142.19(9)                   |

Symmetry code(s): (i)  $-x+1/3, -y+2/3, -z+5/3$ ; (ii)  $y+1/3, -x+y+2/3, -z+5/3$ ; (iii)  $x-y+1/3, x+2/3, -z+5/3$ .

Tab. S4. Factor group analysis for AmNaCr.<sup>a</sup>

| Ion                          | Vibration                                 | Free ion symmetry                            | Site symmetry                                         | Factor group symmetry                                 |
|------------------------------|-------------------------------------------|----------------------------------------------|-------------------------------------------------------|-------------------------------------------------------|
|                              |                                           | $C_{2v}$                                     | $C_1$                                                 | $S_6$                                                 |
| HCOO <sup>-</sup>            | $\nu_1$                                   | $A_1^{(R,IR)}$                               | $A^{(R,IR)}$                                          | $A_g^{(R)} + A_u^{(IR)} + E_g^{(R)} + E_u^{(IR)}$     |
|                              | $\nu_2$                                   | $A_1^{(R,IR)}$                               | $A^{(R,IR)}$                                          | $A_g^{(R)} + A_u^{(IR)} + E_g^{(R)} + E_u^{(IR)}$     |
|                              | $\nu_3$                                   | $A_1^{(R,IR)}$                               | $A^{(R,IR)}$                                          | $A_g^{(R)} + A_u^{(IR)} + E_g^{(R)} + E_u^{(IR)}$     |
|                              | $\nu_4$                                   | $B_1^{(R,IR)}$                               | $A^{(R,IR)}$                                          | $A_g^{(R)} + A_u^{(IR)} + E_g^{(R)} + E_u^{(IR)}$     |
|                              | $\nu_5$                                   | $B_1^{(R,IR)}$                               | $A^{(R,IR)}$                                          | $A_g^{(R)} + A_u^{(IR)} + E_g^{(R)} + E_u^{(IR)}$     |
|                              | $\nu_6$                                   | $B_1^{(R,IR)}$                               | $A^{(R,IR)}$                                          | $A_g^{(R)} + A_u^{(IR)} + E_g^{(R)} + E_u^{(IR)}$     |
|                              | T <sup>g</sup>                            | $A_1^{(R,IR)} + B_1^{(R,IR)} + B_2^{(R,IR)}$ | $3A^{(R,IR)}$                                         | $3A_g^{(R)} + 3A_u^{(IR)} + 3E_g^{(R)} + 3E_u^{(IR)}$ |
| L                            | $A_2^{(R)} + B_1^{(R,IR)} + B_2^{(R,IR)}$ | $3A^{(R,IR)}$                                | $3A_g^{(R)} + 3A_u^{(IR)} + 3E_g^{(R)} + 3E_u^{(IR)}$ |                                                       |
| NH <sub>4</sub> <sup>+</sup> |                                           | $T_d$                                        | $C_3$                                                 | $S_6$                                                 |
|                              | $\nu_1$                                   | $A_1^{(R)}$                                  | $A^{(R,IR)}$                                          | $A_g^{(R)} + A_u^{(IR)}$                              |
|                              | $\nu_2$                                   | $E^{(R)}$                                    | $E^{(R,IR)}$                                          | $E_g^{(R)} + E_u^{(IR)}$                              |
|                              | $\nu_3$                                   | $F_2^{(R,IR)}$                               | $A^{(R,IR)} + E^{(R,IR)}$                             | $A_g^{(R)} + A_u^{(IR)} + E_g^{(R)} + E_u^{(IR)}$     |
|                              | $\nu_4$                                   | $F_2^{(R,IR)}$                               | $A^{(R,IR)} + E^{(R,IR)}$                             | $A_g^{(R)} + A_u^{(IR)} + E_g^{(R)} + E_u^{(IR)}$     |
|                              | T <sup>g</sup>                            | $F_2^{(R,IR)}$                               | $A^{(R,IR)} + E^{(R,IR)}$                             | $A_g^{(R)} + A_u^{(IR)} + E_g^{(R)} + E_u^{(IR)}$     |
| L                            | $F_1^{(-)}$                               | $A^{(R,IR)} + E^{(R,IR)}$                    | $A_g^{(R)} + A_u^{(IR)} + E_g^{(R)} + E_u^{(IR)}$     |                                                       |
| Cr <sup>3+</sup>             |                                           |                                              | $S_6$                                                 | $C_{2v}$                                              |
|                              | T <sup>g</sup>                            |                                              | $A_u^{(IR)} + E_u^{(IR)}$                             | $A_u^{(IR)} + E_u^{(IR)}$                             |
| Na <sup>+</sup>              |                                           |                                              | $S_6$                                                 | $C_{2v}$                                              |
|                              | T <sup>g</sup>                            |                                              | $A_u^{(IR)} + E_u^{(IR)}$                             | $A_u^{(IR)} + E_u^{(IR)}$                             |

<sup>a</sup>Key: (R), Raman active; (IR), infrared active; (-), inactive mode; T, translations; L, librations,  $\nu_1$ - $\nu_6$ (HCOO<sup>-</sup>), characteristic vibrations of formate ions (see in paper);  $\nu_1$ - $\nu_4$ (NH<sub>4</sub><sup>+</sup>), characteristic vibrations of ammonium ions (see in paper).

Tab. S5. Room temperature IR and Raman (at 80 and 300 K) wavenumbers (cm<sup>-1</sup>) measured for AmNaCr and AmNaAlCr compounds and proposed assignments.<sup>a</sup>

| AmNaCr       |            | AmNaAlCr |            |         | Assignment                              |
|--------------|------------|----------|------------|---------|-----------------------------------------|
| Raman (80 K) | Raman (RT) | IR (RT)  | Raman (RT) | IR (RT) |                                         |
|              |            | 3561 w   |            |         | $\nu_3$ (NH <sub>4</sub> <sup>+</sup> ) |
|              |            | 3433 w   |            | 3438 w  | $\nu_3$ (NH <sub>4</sub> <sup>+</sup> ) |
| 3299 vw      | 3277 vw    | 3285 w   | 3277 vw    | 3285 w  | $\nu_3$ (NH <sub>4</sub> <sup>+</sup> ) |
| 3193 vw      |            |          |            | 3188 w  | $\nu_3$ (NH <sub>4</sub> <sup>+</sup> ) |
| 3160 vw      | 3177 vw    | 3179 w   |            | 3163 w  | $\nu_3$ (NH <sub>4</sub> <sup>+</sup> ) |
| 3090 vw      |            | 3099 w   |            | 3119 w  | $\nu_3$ (NH <sub>4</sub> <sup>+</sup> ) |
| 3063 vw      | 3058 vw    |          |            |         | $\nu_3$ (NH <sub>4</sub> <sup>+</sup> ) |
| 3008 vw      | 3003 w     |          | 3019 w     | 3001 w  | $\nu_1$ (NH <sub>4</sub> <sup>+</sup> ) |
| 2986 vw      | 2987 sh    | 2982 m   | 2990sh     |         | $\nu_1$ (NH <sub>4</sub> <sup>+</sup> ) |
| 2964 vw      | 2968 sh    |          |            |         | $\nu_1$ (NH <sub>4</sub> <sup>+</sup> ) |
|              |            | 2920 vw  |            | 2925 vw | $\nu_1$ (NH <sub>4</sub> <sup>+</sup> ) |
| 2910 sh      |            | 2911 w   | 2897 vs    |         | $\nu_1$ (NH <sub>4</sub> <sup>+</sup> ) |
| 2902 m       | 2893 m     | 2893 w   |            | 2897 w  | $\nu_1$ (HCOO <sup>-</sup> )            |
|              |            | 2858 m   | 2847 w     | 2861 w  | $\nu_1$ (HCOO <sup>-</sup> )            |
| 2846 m       | 2840 w     | 2847 m   | 2786 w     |         | $\nu_1$ (NH <sub>4</sub> <sup>+</sup> ) |
| 2787 w       | 2778 w     | 2770 vw  |            | 2787 vw | overtone                                |
|              |            | 2738 vw  |            |         | overtone                                |
|              |            | 2622 vw  |            | 2663 sh | overtone                                |
|              |            | 2611 vw  |            | 2651 w  | overtone                                |
| 1706 vw      | 1701 vw    | 1709 w   | 1701 vw    | 1712 w  | $\nu_2$ (NH <sub>4</sub> <sup>+</sup> ) |
| 1650 m       | 1652 s     | 1643 sh  | 1668 w     | 1639 s  | $\nu_4$ (HCOO <sup>-</sup> )            |
|              |            | 1625 vs  |            | 1624 s  | $\nu_4$ (HCOO <sup>-</sup> )            |
| 1589 vw      | 1587 vw    | 1603 vs  | 1594 w     | 1604 vs | $\nu_4$ (HCOO <sup>-</sup> )            |
| 1485 vw      |            | 1473 w   | 1478 vw    | 1476 vw | $\nu_4$ (NH <sub>4</sub> <sup>+</sup> ) |
| 1460 w       | 1455 w     | 1443 w   | 1457 w     | 1445 w  | $\nu_4$ (NH <sub>4</sub> <sup>+</sup> ) |
|              | 1398 s     | 1399 m   |            |         | $\nu_5$ (HCOO <sup>-</sup> )            |
| 1403 s       |            | 1386 sh  | 1402 vs    | 1403 m  | $\nu_5$ (HCOO <sup>-</sup> )            |
| 1349 sh      | 1344 vs    |          |            |         | $\nu_5$ (HCOO <sup>-</sup> )            |
| 1342 vs      |            |          | 1359 vs    |         | $\nu_5$ (HCOO <sup>-</sup> )            |
|              |            | 1326 sh  |            | 1346 w  | $\nu_2$ (HCOO <sup>-</sup> )            |
| 1312 m       | 1312 s     | 1311 vs  | 1323 s     | 1333 vs | $\nu_2$ (HCOO <sup>-</sup> )            |
|              |            | 1285 m   |            | 1311 m  | $\nu_2$ (HCOO <sup>-</sup> )            |
| 1063 w       | 1063 w     | 1063 vw  | 1068 w     | 1068 vw | $\nu_6$ (HCOO <sup>-</sup> )            |
| 813 w        | 810 w      | 815 m    | 805 w      | 823 m   | $\nu_3$ (HCOO <sup>-</sup> )            |

|        |        |        |        |  |                                                     |
|--------|--------|--------|--------|--|-----------------------------------------------------|
| 806 w  | 807 w  | 801 sh |        |  | $\nu_3(\text{HCOO}^-)$                              |
|        |        | 768 vw | 763 vw |  | $\nu_3(\text{HCOO}^-)$                              |
| 498 vw |        | 475 vw | 483 sh |  | $\text{L}(\text{NH}_4^+)$                           |
|        |        | 424 m  | 465 m  |  | $\text{T}'(\text{M}^{3+})$                          |
| 396 vw |        |        | 424 m  |  | $\text{T}'(\text{M}^{3+})$                          |
| 350 w  | 345 m  |        | 342 w  |  | $\text{L}(\text{NH}_4^+)$                           |
| 319 vw |        |        |        |  | $\text{L}(\text{NH}_4^+)$                           |
|        |        | 284 w  | 323 w  |  | $\text{T}'(\text{M}^{\text{III}})$                  |
|        |        |        | 312 w  |  | $\text{T}'(\text{NH}_4^+)$                          |
|        |        | 258 vw |        |  | $\text{T}'(\text{Na}^+)$                            |
| 250 vw |        |        | 295 w  |  | $\text{T}'(\text{NH}_4^+)$                          |
| 243 w  | 235 w  |        | 236 w  |  | $\text{T}'(\text{NH}_4^+)$                          |
|        |        | 226 w  | 232 w  |  | $\text{T}'(\text{Na}^+)+\text{T}'(\text{NH}_4^+)$   |
| 226 w  | 218 m  |        | 221 m  |  | $\text{T}'(\text{HCOO}^-)$                          |
|        |        | 206 w  | 206 w  |  | $\text{T}'(\text{HCOO}^-)+\text{T}'(\text{NH}_4^+)$ |
| 204 w  | 196 m  |        | 194 m  |  | $\text{T}'(\text{HCOO}^-)$                          |
|        |        | 190 sh | 190 w  |  | $\text{T}'(\text{HCOO}^-)+\text{T}'(\text{NH}_4^+)$ |
| 159 w  | 149 sh |        | 151 m  |  | $\text{T}'(\text{HCOO}^-)$                          |
|        |        | 144 w  | 144 w  |  | $\text{T}'(\text{HCOO}^-)+\text{T}'(\text{NH}_4^+)$ |
| 134 w  | 132 m  |        | 136 m  |  | $\text{T}'(\text{HCOO}^-)$                          |
| 113 m  | 107 vs |        | 109 vs |  | $\text{L}(\text{HCOO}^-)$                           |
|        |        | 103 vw | 103 vw |  | $\text{L}(\text{HCOO}^-)$                           |
| 103 m  | 96 vs  |        | 96 vs  |  | $\text{L}(\text{HCOO}^-)$                           |
| 76 vw  |        | 81 w   | 84 w   |  | $\text{L}(\text{HCOO}^-)$                           |
| 62 w   | 59 m   |        | 60 w   |  | $\text{L}(\text{HCOO}^-)$                           |

<sup>a</sup>Key: s, strong; m, medium; w, weak; vw, very weak; sh, shoulder;  $\nu_1$ – $\nu_6(\text{HCOO}^-)$ , characteristic vibrations of formate ions (see in paper);  $\nu_1$ – $\nu_4(\text{NH}_4^+)$ , characteristic vibrations of ammonium ions (see in paper); T', translations; L, librations.

Tab. S6. Room temperature IR and Raman (at 80 and 300 K) wavenumbers ( $\text{cm}^{-1}$ ) measured for AmNaCr along with detailed assignments using DFT harmonic approximation.<sup>a</sup>

| Sym.  | Calculated |      | Experimental |            |         | Assignment       |
|-------|------------|------|--------------|------------|---------|------------------|
|       | Raman      | IR   | Raman (80 K) | Raman (RT) | IR (RT) |                  |
| $A_u$ |            | 3375 |              |            | 3561 w  | $\nu(\text{NH})$ |
| $A_g$ | 3374       |      | 3299 vw      | 3277 vw    | 3433 w  |                  |
|       |            |      | 3193 vw      |            | 3285 w  |                  |
|       |            |      | 3160 vw      | 3177 vw    | 3179 w  |                  |
|       |            |      | 3090 vw      |            | 3099 w  |                  |

|                |      |         |         |         |                                                                                            |
|----------------|------|---------|---------|---------|--------------------------------------------------------------------------------------------|
|                |      | 3063 vw | 3058 vw |         |                                                                                            |
|                |      | 3008 vw | 3003 w  |         |                                                                                            |
|                |      |         |         | 2982 m  |                                                                                            |
|                |      |         |         | 2920 vw |                                                                                            |
|                |      | 2986 vw | 2987 sh |         |                                                                                            |
|                |      | 2964 vw | 2968 sh |         |                                                                                            |
|                |      | 2910 sh |         |         |                                                                                            |
|                |      |         |         | 2911 w  |                                                                                            |
| A <sub>u</sub> | 2938 |         |         | 2893 w  |                                                                                            |
| E <sub>u</sub> | 2937 |         |         | 2858 m  | v <sub>1</sub> (HCOO <sup>-</sup> )                                                        |
| E <sub>g</sub> | 2938 | 2902 vs | 2893 vs |         | v <sub>1</sub> (HCOO <sup>-</sup> )                                                        |
| A <sub>g</sub> | 2937 |         |         |         | v <sub>1</sub> (HCOO <sup>-</sup> )                                                        |
|                |      |         |         | 2847 m  | v <sub>1</sub> (HCOO <sup>-</sup> )                                                        |
| A <sub>g</sub> | 2871 | 2846 m  | 2840 w  |         |                                                                                            |
| E <sub>g</sub> | 2825 | 2787 w  | 2778 w  |         | v <sub>3</sub> (NH <sub>4</sub> <sup>+</sup> )                                             |
| A <sub>u</sub> | 2876 |         |         | 2770 vw | v <sub>3</sub> (NH <sub>4</sub> <sup>+</sup> )                                             |
| E <sub>u</sub> | 2828 |         |         | 2738 vw | v <sub>1</sub> (NH <sub>4</sub> <sup>+</sup> )                                             |
|                |      |         |         | 2622 vw | v <sub>1</sub> (NH <sub>4</sub> <sup>+</sup> )                                             |
|                |      |         |         | 2611 vw |                                                                                            |
| E <sub>u</sub> | 1696 |         |         | 1709 w  |                                                                                            |
| E <sub>g</sub> | 1686 | 1706 vw | 1701 vw |         | v <sub>2</sub> (NH <sub>4</sub> <sup>+</sup> )                                             |
| A <sub>g</sub> | 1648 | 1650 m  | 1652 s  |         | v <sub>2</sub> (NH <sub>4</sub> <sup>+</sup> )                                             |
|                |      |         |         | 1643 sh | v <sub>2</sub> (NH <sub>4</sub> <sup>+</sup> )+v <sub>4</sub> (HCOO <sup>-</sup> )         |
| E <sub>u</sub> | 1596 |         |         | 1625 vs |                                                                                            |
| A <sub>u</sub> | 1595 |         |         | 1603 vs | v <sub>2</sub> (NH <sub>4</sub> <sup>+</sup> )+v <sub>4</sub> (HCOO <sup>-</sup> )         |
| E <sub>g</sub> | 1589 | 1589 vw | 1587 vw |         | v <sub>2</sub> (NH <sub>4</sub> <sup>+</sup> )+v <sub>4</sub> (HCOO <sup>-</sup> )         |
| A <sub>g</sub> | 1493 | 1485 vw |         |         | v <sub>2</sub> (NH <sub>4</sub> <sup>+</sup> )+v <sub>4</sub> (HCOO <sup>-</sup> )         |
| A <sub>u</sub> | 1492 |         |         | 1473 w  | v <sub>4</sub> (NH <sub>4</sub> <sup>+</sup> )                                             |
| E <sub>g</sub> | 1441 | 1460 w  | 1455 w  |         | v <sub>4</sub> (NH <sub>4</sub> <sup>+</sup> )                                             |
| E <sub>u</sub> | 1429 |         |         | 1443 w  | v <sub>4</sub> (NH <sub>4</sub> <sup>+</sup> )                                             |
| E <sub>g</sub> | 1362 | 1403 s  | 1398 s  |         | v <sub>4</sub> (NH <sub>4</sub> <sup>+</sup> )                                             |
| E <sub>u</sub> | 1358 |         |         | 1399 m  | v <sub>5</sub> (HCOO <sup>-</sup> )                                                        |
|                |      |         |         | 1386 sh | v <sub>5</sub> (HCOO <sup>-</sup> )                                                        |
| A <sub>u</sub> | 1355 |         |         | 1326 sh |                                                                                            |
| A <sub>g</sub> | 1355 | 1349 sh | 1344 vs |         | v <sub>5</sub> (HCOO <sup>-</sup> )                                                        |
| A <sub>g</sub> | 1326 | 1342 vs |         |         | v <sub>5</sub> (HCOO <sup>-</sup> )                                                        |
| A <sub>u</sub> | 1318 |         |         | 1311 vs | v <sub>2</sub> (HCOO <sup>-</sup> )                                                        |
| E <sub>g</sub> | 1307 | 1312 m  | 1312 s  |         | v <sub>2</sub> (HCOO <sup>-</sup> )                                                        |
| E <sub>u</sub> | 1303 |         |         | 1285 m  | v <sub>2</sub> (HCOO <sup>-</sup> )                                                        |
| A <sub>u</sub> | 1011 |         |         | 1063 vw | v <sub>2</sub> (HCOO <sup>-</sup> )                                                        |
| E <sub>g</sub> | 1010 | 1063 w  | 1063 w  |         | v <sub>6</sub> (HCOO <sup>-</sup> )                                                        |
| E <sub>u</sub> | 1008 |         |         |         | v <sub>6</sub> (HCOO <sup>-</sup> )                                                        |
| A <sub>g</sub> | 1007 |         |         |         | v <sub>6</sub> (HCOO <sup>-</sup> )                                                        |
| A <sub>u</sub> | 790  |         |         | 815 m   | v <sub>6</sub> (HCOO <sup>-</sup> )                                                        |
| A <sub>g</sub> | 784  | 813 w   | 810 w   |         | v <sub>3</sub> (HCOO <sup>-</sup> )+L(NH <sub>4</sub> <sup>+</sup> )+T'(M <sup>III</sup> ) |
| E <sub>u</sub> | 783  |         |         | 801 sh  | v <sub>3</sub> (HCOO <sup>-</sup> )+L(NH <sub>4</sub> <sup>+</sup> )                       |

|                |     |     |        |        |                                                                                                    |
|----------------|-----|-----|--------|--------|----------------------------------------------------------------------------------------------------|
| E <sub>g</sub> | 774 |     | 806 w  | 807 w  | v <sub>3</sub> (HCOO <sup>-</sup> )+T'(M <sup>III</sup> )                                          |
| A <sub>u</sub> |     | 628 |        | 768 vw | v <sub>3</sub> (HCOO <sup>-</sup> )+L(NH <sub>4</sub> <sup>+</sup> )                               |
| A <sub>g</sub> | 626 |     | 498 vw |        | L(NH <sub>4</sub> <sup>+</sup> )                                                                   |
| E <sub>u</sub> |     | 488 |        | 475 vw | L(NH <sub>4</sub> <sup>+</sup> )                                                                   |
| E <sub>g</sub> | 481 |     | 396 vw |        | L(NH <sub>4</sub> <sup>+</sup> )                                                                   |
| A <sub>u</sub> |     | 422 |        | 424 m  | L(NH <sub>4</sub> <sup>+</sup> )                                                                   |
| E <sub>u</sub> |     | 420 |        |        | L(NH <sub>4</sub> <sup>+</sup> )+L(HCOO <sup>-</sup> )+T'(Cr <sup>3+</sup> )                       |
| A <sub>g</sub> | 336 |     | 350 w  | 345 m  | L(NH <sub>4</sub> <sup>+</sup> )+L(HCOO <sup>-</sup> )+T'(Cr <sup>3+</sup> )                       |
| E <sub>g</sub> | 319 |     | 319 vw |        | L(NH <sub>4</sub> <sup>+</sup> )+L(HCOO <sup>-</sup> )                                             |
| E <sub>u</sub> |     | 286 |        | 284 w  | L(NH <sub>4</sub> <sup>+</sup> )+L(HCOO <sup>-</sup> )                                             |
| A <sub>u</sub> |     | 281 |        |        | T'(NH <sub>4</sub> <sup>+</sup> )+L(HCOO <sup>-</sup> )+T'(Cr <sup>3+</sup> )+T'(Na <sup>+</sup> ) |
| E <sub>g</sub> | 268 |     |        |        | T'(NH <sub>4</sub> <sup>+</sup> )+L(HCOO <sup>-</sup> )+T'(Cr <sup>3+</sup> )                      |
| A <sub>u</sub> |     | 261 |        | 258 vw | T'(NH <sub>4</sub> <sup>+</sup> )+L(HCOO <sup>-</sup> )                                            |
| A <sub>g</sub> | 256 |     | 250 vw |        | T'(NH <sub>4</sub> <sup>+</sup> )+T'(HCOO <sup>-</sup> )+T'(Na <sup>+</sup> )                      |
| E <sub>u</sub> |     | 254 |        |        | T'(NH <sub>4</sub> <sup>+</sup> )+L(HCOO <sup>-</sup> )                                            |
| A <sub>u</sub> |     | 234 |        | 226 w  | T'(NH <sub>4</sub> <sup>+</sup> )+T'(HCOO <sup>-</sup> )+T'(Na <sup>+</sup> )                      |
| A <sub>g</sub> | 228 |     | 243 w  | 235 w  | T'(NH <sub>4</sub> <sup>+</sup> )+T'(HCOO <sup>-</sup> )+T'(Na <sup>+</sup> )                      |
| E <sub>g</sub> | 225 |     | 226 w  | 218 m  | T'(NH <sub>4</sub> <sup>+</sup> )+T'(HCOO <sup>-</sup> )                                           |
| E <sub>u</sub> |     | 217 |        |        | T'(NH <sub>4</sub> <sup>+</sup> )+T'(HCOO <sup>-</sup> )                                           |
| A <sub>g</sub> | 204 |     | 204 w  |        | T'(NH <sub>4</sub> <sup>+</sup> )+L(HCOO <sup>-</sup> )+T'(Na <sup>+</sup> )                       |
| E <sub>u</sub> |     | 197 |        | 206 w  | T'(NH <sub>4</sub> <sup>+</sup> )+T'(HCOO <sup>-</sup> )                                           |
| A <sub>u</sub> |     | 195 |        | 190 sh | T'(NH <sub>4</sub> <sup>+</sup> )+L(HCOO <sup>-</sup> )+T'(Na <sup>+</sup> )                       |
| A <sub>g</sub> | 168 |     |        | 196 m  | T'(NH <sub>4</sub> <sup>+</sup> )+T'(HCOO <sup>-</sup> )+T'(Na <sup>+</sup> )                      |
| A <sub>u</sub> |     | 160 |        |        | T'(NH <sub>4</sub> <sup>+</sup> )+T'(HCOO <sup>-</sup> )                                           |
| E <sub>g</sub> | 159 |     | 159 w  | 149 sh | T'(NH <sub>4</sub> <sup>+</sup> )+T'(HCOO <sup>-</sup> )+T'(Na <sup>+</sup> )                      |
| E <sub>u</sub> |     | 149 |        | 144 w  | L(NH <sub>4</sub> <sup>+</sup> )+T'(HCOO <sup>-</sup> )                                            |
| E <sub>g</sub> | 126 |     | 134 w  | 132 m  | L(NH <sub>4</sub> <sup>+</sup> )+T'(HCOO <sup>-</sup> )+T'(Cr <sup>3+</sup> )+T'(Na <sup>+</sup> ) |
| A <sub>u</sub> |     | 120 |        |        | T'(NH <sub>4</sub> <sup>+</sup> )+T'(HCOO <sup>-</sup> )                                           |
| A <sub>g</sub> | 115 |     | 113 m  | 107 vs | T'(NH <sub>4</sub> <sup>+</sup> )+L(HCOO <sup>-</sup> )                                            |
| E <sub>u</sub> |     | 107 |        | 103 vw | T'(NH <sub>4</sub> <sup>+</sup> )+L(HCOO <sup>-</sup> )                                            |
| E <sub>g</sub> | 104 |     | 103 m  | 96 vs  | L(HCOO <sup>-</sup> )+T'(Cr <sup>3+</sup> )+T'(Na <sup>+</sup> )                                   |
| A <sub>g</sub> | 92  |     | 76 vw  |        | T'(NH <sub>4</sub> <sup>+</sup> )+L(HCOO <sup>-</sup> )                                            |
| A <sub>u</sub> |     | 82  |        | 81 w   | L(NH <sub>4</sub> <sup>+</sup> )+L(HCOO <sup>-</sup> )                                             |
| E <sub>u</sub> |     | 79  |        |        | L(NH <sub>4</sub> <sup>+</sup> )+L(HCOO <sup>-</sup> )+T'(Cr <sup>3+</sup> )+T'(Na <sup>+</sup> )  |
| E <sub>g</sub> | 40  |     | 62 w   | 59 m   | L(NH <sub>4</sub> <sup>+</sup> )+L(HCOO <sup>-</sup> )+T'(Cr <sup>3+</sup> )+T'(Na <sup>+</sup> )  |
|                |     |     |        |        | T'(NH <sub>4</sub> <sup>+</sup> )+L(HCOO <sup>-</sup> )                                            |

<sup>a</sup>Key: s, strong; m, medium; w, weak; vw, very weak; sh, shoulder; v<sub>1</sub>-v<sub>6</sub>(HCOO<sup>-</sup>), characteristic vibrations of formate ions (see in paper); v<sub>1</sub>-v<sub>4</sub>(NH<sub>4</sub><sup>+</sup>), characteristic vibrations of ammonium ions (see in paper); T', translations; L, librations.
